# Supplementary material
Source: PubMed Central journal article supplement (PMC10991432)

# Absolute quantification of tumor-infiltrating immune cells in high-grade glioma identifies prognostic and radiomic values

## Supplementary Figures

**Supplementary Figure 1.** Gating strategy of flow cytometry for tumor-infiltrating immune cells in core area of high-grade gliomas.

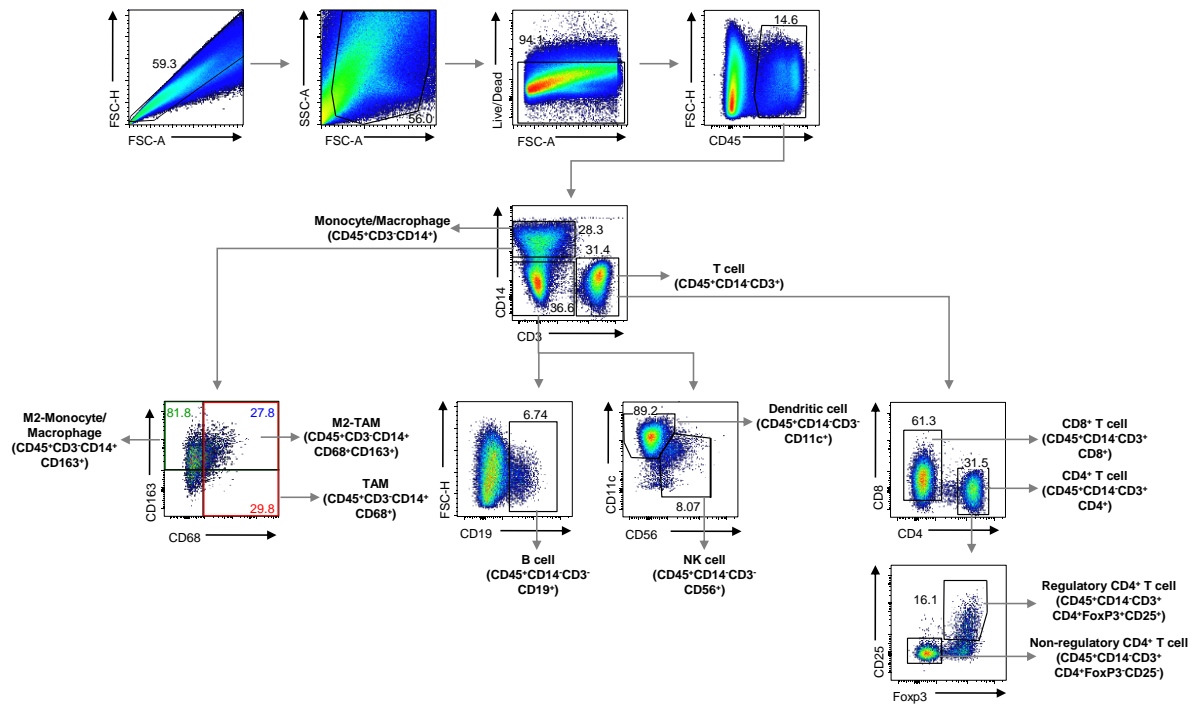

**Supplementary Figure 2.** Processes for developing radiomic signatures of immune phenotypes: multimodal MRI images (T1CE, T2-FLAIR, ADC, and rCBV maps) were coregistered, isotropically resampled, skull-stripped, and subregional tumor masks were segmented using a convolutional neural network followed by manual correction. Radiomic features including first-order, gray-level non-uniformity, and shape features were extracted (107 features for each of 4 sequences), and radiomic signatures for immune phenotypes as well as IDH genotype were developed and validated.

*Abbreviations: T1CE, T1-weighted contrast-enhanced; T2-FLAIR, T2-weighted fluid attenuated inversion recovery; ADC, apparent diffusion coefficient; IDH, isocitrate dehydrogenase; and relative cerebral blood volume, rCBV.*

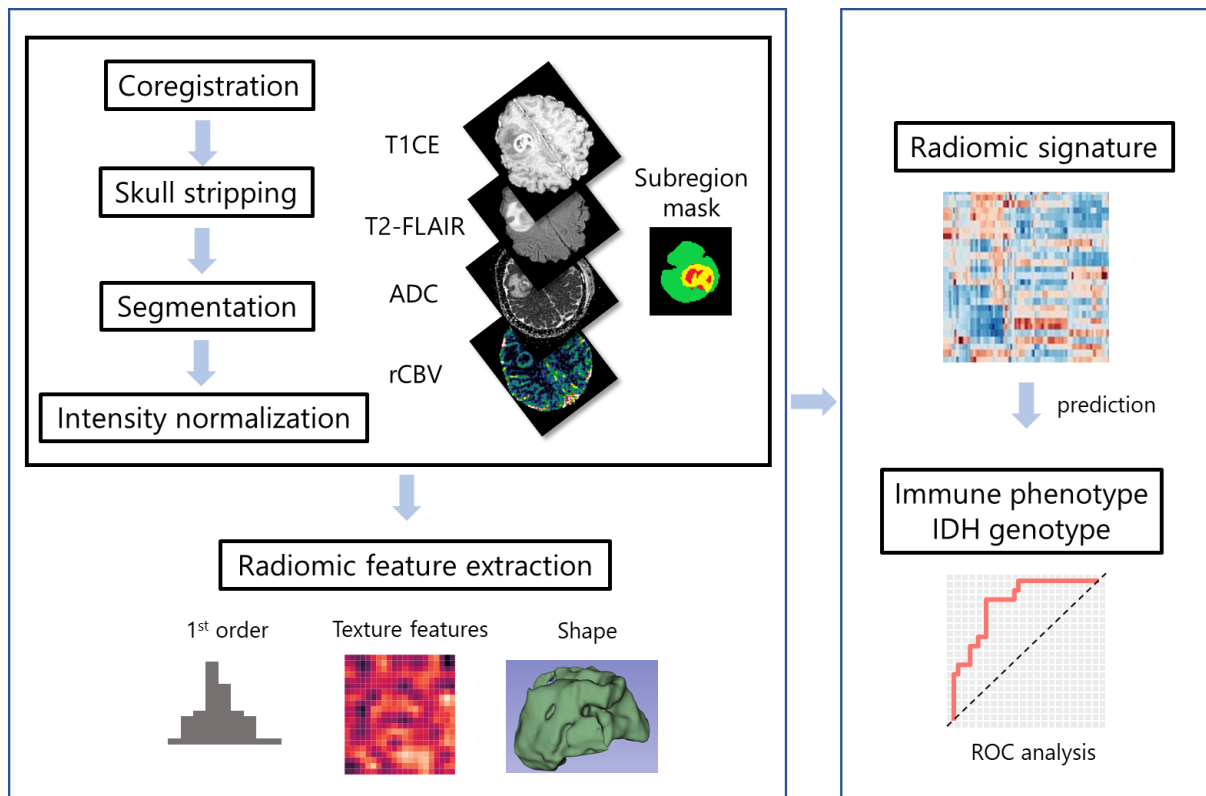

**Supplementary Figure 3. A.** The ratio of CD4<sup>+</sup>FoxP3<sup>+</sup>CD25<sup>+</sup> cells (Treg cells) and of CD4<sup>+</sup> cells (T4 cells) in CD45<sup>+</sup> cells were plotted and samples those outside the 95% confidence interval were defined as Treg high and Treg low. **B.** Treg high and Treg low group showed no survival differences ( $p=0.170$ ). **C.** The ratio of CD4<sup>+</sup>FoxP3<sup>+</sup>CD25<sup>+</sup> cells (Treg cells) and of CD8<sup>+</sup> cells (T8 cells) in CD45<sup>+</sup> cells were plotted and samples those outside the 95% confidence interval were defined as Treg/Tc high and Treg/Tc low. **D.** Treg/Tc high and Treg/Tc low group showed no survival differences ( $p=0.320$ ).

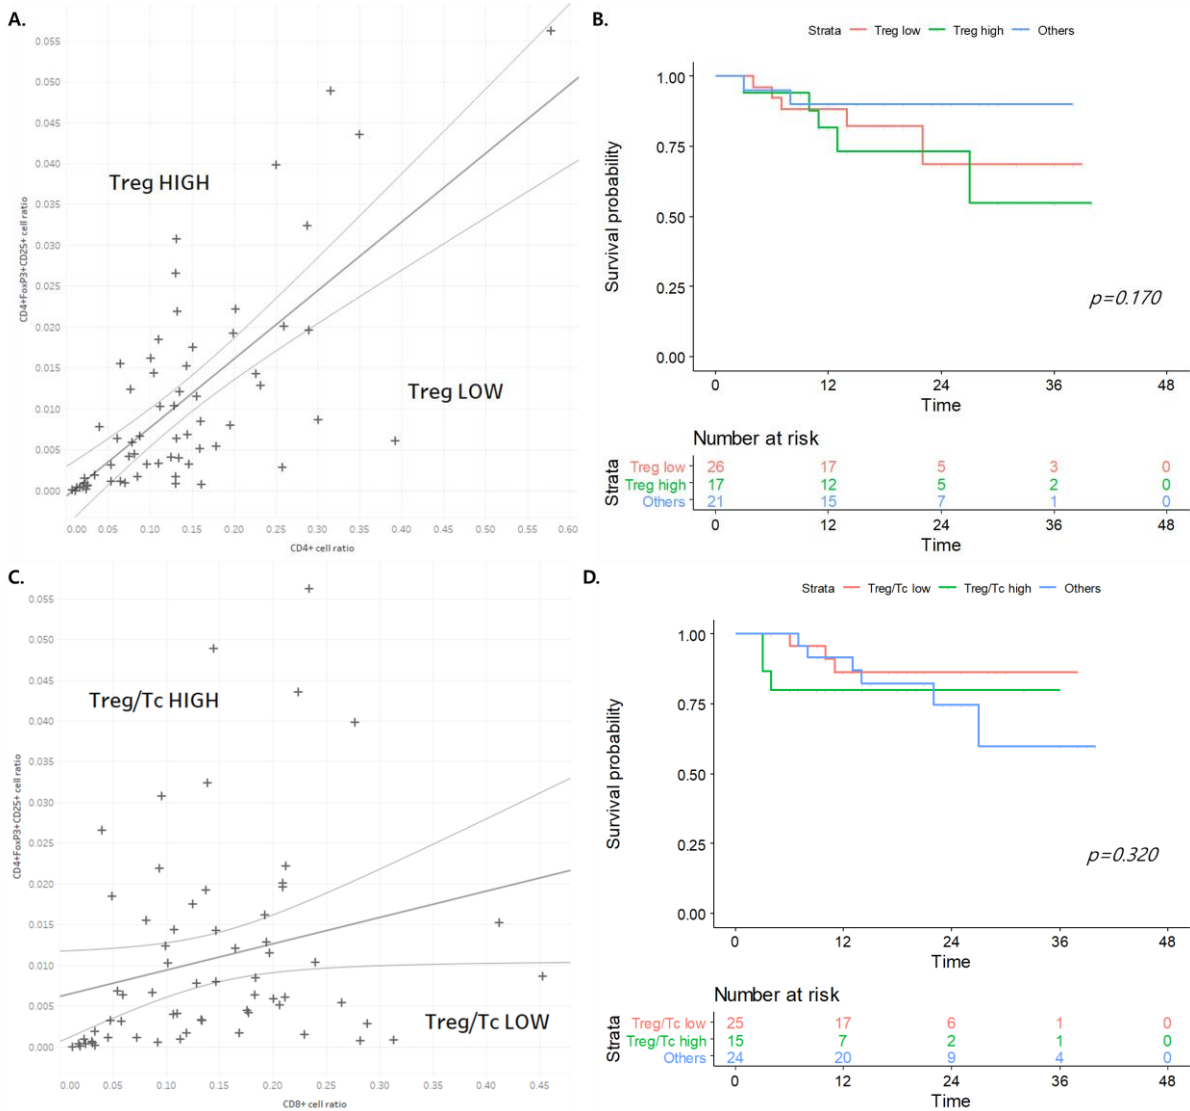

Supplement: 262_2020_2836_MOESM1_ESM.pdf [file 262_2020_2836_MOESM1_ESM.pdf]
